# Supplementary material for: Notch pathway activation can replace the requirement for Wnt4 and Wnt9b in mesenchymal-to-epithelial transition of nephron stem cells
Source: Oxford University Press journal article supplement (doi:10.1242/dev.070433), 2011-08-19
Supplement: dev070433tables1.pdf [file dev070433tables1.pdf]

Table S1. Primers used

| Gene                        | Cycles | Forward primer              | Reverse primer              |
|-----------------------------|--------|-----------------------------|-----------------------------|
| <i>Aqp1</i> <sup>*</sup>    | 28     | AGGCTTCAATTACCCACTGG        | GTGAGCACCGCTGATGTGA         |
| <i>Brn1</i> <sup>†</sup>    | 26     | AGATGGTCCAGAGCGACTTC        | ACCACGGTGAGCTGGCTT          |
| <i>Cdh6</i> <sup>‡</sup>    | 26     | GGTGAGGGACACGAGATGTT        | GACAGGAGGTTCCGTCCACAT       |
| <i>Clnkb1</i> <sup>†</sup>  | 30     | CTTCATGAACTGCACCCTCA        | GTGGGTCCTTTTACAACGC         |
| <i>Dll1</i> <sup>†</sup>    | 30     | AGGTTGCTCTGTGTTCTGCC        | ATGTTGGTCATCACACCCTG        |
| <i>Fgf8</i> <sup>†</sup>    | 28     | AACTCGGACTCTGCTTCAA         | CCGGACCTACCAGCTCTAC         |
| <i>Gapdh</i> <sup>‡</sup>   | 28     | AATGTGTCCGTCGTGGATCTGA      | GATGCCTGCTTACCACCTTCT       |
| <i>Gdnf</i> <sup>§</sup>    | 30     | CCCGAAGATTATCCTGACCA        | TAGCCCAAACCCAAGTCAGT        |
| <i>GFP</i> <sup>‡</sup>     | 30     | GCACGACTTCTTCAAGTCCGCCATGCC | GCGGATCTTGAAGTTCACCTTGATGCC |
| <i>Greb1</i> <sup>*</sup>   | 30     | GGCTACGTTTCTAGAAGGAAGGA     | CTCTGCTCAGCACCCAGACAG       |
| <i>Hes1</i> <sup>†</sup>    | 24     | GAAAGATAGCTCCCGGCATT        | GGTATTTCCCCAACACGCT         |
| <i>Hes5</i> <sup>†</sup>    | 30     | GCTGCTGGAGCAGGAGTTC         | TAGTCCTGGTGCAGGCTCTT        |
| <i>Lxh1</i> <sup>§</sup>    | 30     | TGTTCTCTTTGGCGACACTG        | TGTTCTCTTTGGCGACACTG        |
| <i>Papss2</i> <sup>†</sup>  | 30     | GCAAAGCCAGTTTGTAAACCG       | TGGTAGACCACATTGGTGGAT       |
| <i>Pax8</i> <sup>*</sup>    | 26     | CACCTTCGTACGGACACCTT        | GTTGCGTCCCAGAGGTGTAT        |
| <i>Podocin</i> <sup>†</sup> | 28     | GCCTCCCTGATCTTCATCAT        | AAAAAGAACAGGCCAGGACC        |
| <i>Six2</i> <sup>‡</sup>    | 30     | GCAAGTCAGCAACTGGTTCA        | AACTGCCTAGCACCGACTTG        |
| <i>Wnt4</i> <sup>‡</sup>    | 26     | CTGGAGAAGTGTGGCTGTGA        | GGACGTCCACAAAGGACTGT        |
| <i>Wt1</i> <sup>§</sup>     | 24     | ACCCAGGCTGCAATAAGAGA        | GCTGAAGGGCTTTTCACTTG        |

<sup>\*</sup>Primer Bank ([pga.mgh.harvard.edu/primerbank](http://pga.mgh.harvard.edu/primerbank)).

<sup>†</sup>qPrimerDepot ([mouseprimerdepot.nci.nih.gov](http://mouseprimerdepot.nci.nih.gov)).

<sup>‡</sup>Designed in-house.

<sup>§</sup>Osafune et al., 2006.
